# Supplementary material for: Limitations for colorimetric aggregation assay of metal ions and ways of their overcoming
Source: Royal Society of Chemistry journal article supplement (doi:10.1039/d0ay02068k), 2020-12-11
Supplement: d0ay02068k1.pdf [file d0ay02068k1.pdf]

## SUPPLEMENT INFORMATION

### Limitations for colorimetric aggregation assay of metal ions and ways of their overcoming

Berlina Anna N., Sotnikov Dmitry V., Komova Nadezhda S., Zherdev Anatoly V., Dzantiev Boris B.

*A.N. Bach Institute of Biochemistry, Research Center of Biotechnology of the Russian Academy of Sciences, Leninsky prospect 33, Moscow 119071, Russia*

\*Corresponding author e-mail: [dzantiev@inbi.ras.ru](mailto:dzantiev@inbi.ras.ru), phone: +7(495)9543142, *Leninsky prospect 33, Moscow 119071, Russia*

### Numerical simulation of the system

For numerical simulation using the COPASI software, the following parameters were used:

>Model

>Biochemical

>Compartments

>Probe

Details: Simulation Type – fixed

Contained Species – A, A2Pb, APb, APbA, Pb

>Species

| Name | Simulation Type | Initial Concentration (mmol/ml) |
|------|-----------------|---------------------------------|
| A    | Reactions       | 1e-05                           |
| APb  | Reactions       | 0                               |
| Pb   | Reactions       | 1e-07                           |
| A2Pb | Reactions       | 0                               |
| APbA | Reactions       | 0                               |

>Reactions:

>Reaction 1

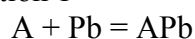

Rate Law: Mass action (reversible)

>Reaction 2

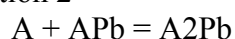

Rate Law: Mass action (reversible)

>Reaction 3

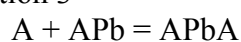

Rate Law: Mass action (reversible)

>Parameter Overview

| k1(Reaction 1)<br>ml/(mmol*s) | k2(Reaction 1)<br>1/s | k1(Reaction 2)<br>ml/(mmol*s) | k2(Reaction 2)<br>1/s | k1(Reaction 3)<br>ml/(mmol*s) | k2(Reaction 3)<br>1/s |
|-------------------------------|-----------------------|-------------------------------|-----------------------|-------------------------------|-----------------------|
| 10000                         | 0.01                  | 10000                         | 0.01                  | 10000                         | 0.01                  |

>Mathematical

>Differential equations

$$\begin{aligned} \frac{d([A] \cdot V_{\text{compartment}})}{d t} &= -V_{\text{compartment}} \cdot ((10000 \cdot [A] \cdot [Pb] - 0.01 \cdot [APb])) \\ &\quad - V_{\text{compartment}} \cdot ((10000 \cdot [A] \cdot [APb] - 0.01 \cdot [A2Pb])) \\ &\quad - V_{\text{compartment}} \cdot ((10000 \cdot [A] \cdot [APb] - 0.01 \cdot [APbA])) \\ \frac{d([APb] \cdot V_{\text{compartment}})}{d t} &= +V_{\text{compartment}} \cdot ((10000 \cdot [A] \cdot [Pb] - 0.01 \cdot [APb])) \\ &\quad - V_{\text{compartment}} \cdot ((10000 \cdot [A] \cdot [APb] - 0.01 \cdot [A2Pb])) \\ &\quad - V_{\text{compartment}} \cdot ((10000 \cdot [A] \cdot [APb] - 0.01 \cdot [APbA])) \\ \frac{d([Pb] \cdot V_{\text{compartment}})}{d t} &= -V_{\text{compartment}} \cdot ((10000 \cdot [A] \cdot [Pb] - 0.01 \cdot [APb])) \\ \frac{d([A2Pb] \cdot V_{\text{compartment}})}{d t} &= +V_{\text{compartment}} \cdot ((10000 \cdot [A] \cdot [APb] - 0.01 \cdot [A2Pb])) \\ \frac{d([APbA] \cdot V_{\text{compartment}})}{d t} &= +V_{\text{compartment}} \cdot ((10000 \cdot [A] \cdot [APb] - 0.01 \cdot [APbA])) \end{aligned}$$

>Tasks

>Time course

Duration (s) – 300, Interval size (s) – 3, Intervals – 100

>Parameter scan

Object – [Pb]<sub>0</sub>

Intervals – 100, min – 1e-07, max – 4e-05

Task – Time course

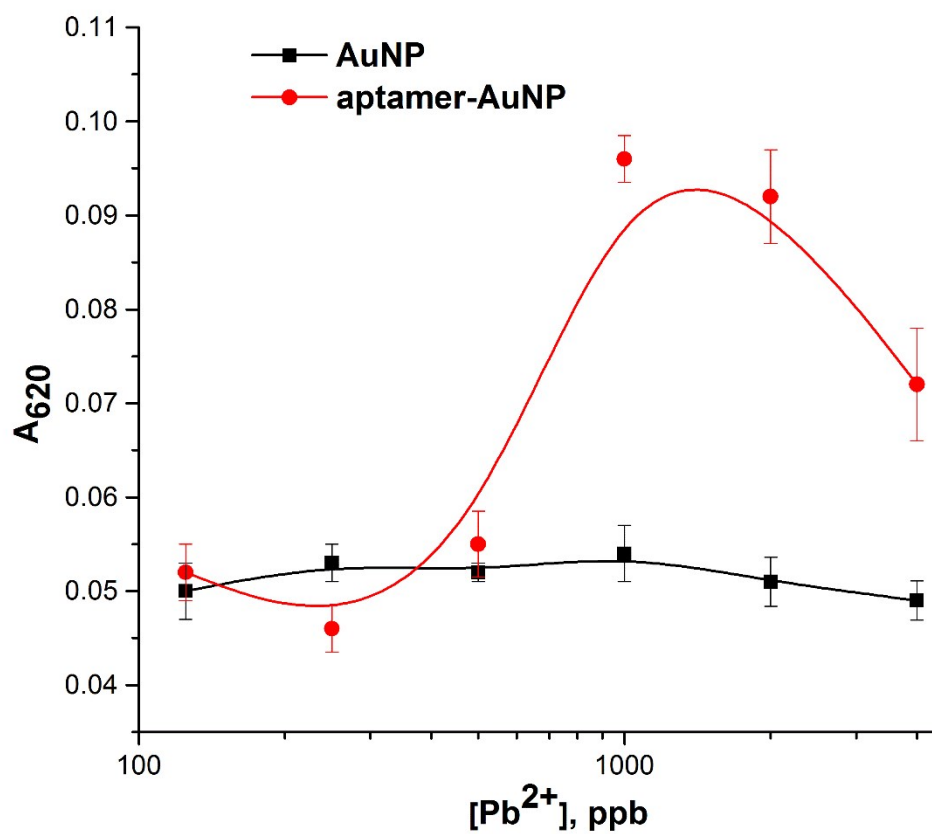

**Fig. S1.** Optical density versus  $Pb^{2+}$  ion concentration ( $n=3$ ). Red curve corresponds to the gold nanoparticles conjugated with aptamer, black curve (below) corresponds to native citrate-capped gold nanoparticles
